# Supplementary material for: Efficient catalytic reduction of azo dyes by N,N-dimethylformamide mediated by viologen
Source: Royal Society of Chemistry journal article supplement (doi:10.1039/c4nj00342j), 2014-08-28
Supplement: c4nj00342j1.pdf [file c4nj00342j1.pdf]

## New Journal of Chemistry

### Supporting Information

#### Efficiently catalytic Reduction of Azo Dyes by N,N-Dimethylformamide

#### Mediated by Viologen \*\*

Gui-Qi Gao and An-Wu Xu\*

Division of Nanomaterials and Chemistry, Hefei National Laboratory for Physical Sciences at Microscale, Department of Chemistry, University of Science and Technology of China, Hefei 230026, China

#### Experimental Section

##### Materials and General Procedures:

8-hydroxy-7-(4-sulfo-1-naphthylazo)-5-quinolinesulfonic acid disodium salt (SNAZOXS<sup>2-</sup>), Congo Red (CR), Methyl Orange (MO), Nitrazin Yellow (NY), Beryllon II (Be) were selected as azo dye model compounds. The chemical structures of the dyes are illustrated in [Fig. S1](#). Dyes were purchased from Sigma and used without additional purification. Stock solutions of 2 mM were prepared in deionised water. The UV-Vis absorption spectra were recorded on a HITACHI U-3900 spectrophotometer and the fluorescence spectra were measured with a HITACHI F-4600 fluorescence spectrophotometer ( $\lambda_{ex} = 330$  nm). The extent of fading of each dye was determined by the decrease in absorption at  $\lambda_{max}$ . Since dye solutions obey the Beer-Lambert law, the concentration of the residual dye could be determined spectrophotometrically. The decolorization of dye, expressed as dye decolorization (%), was calculated by means of the formula: decolorization (%) =  $[(C_i - C_t)/C_i] \times 100$ , where,  $C_i$ : initial concentration of the dye,  $C_t$ : dye

concentration along the time. The decolorization efficiency of each dye was shown as dye decolorization (%).

Analytical characterization was performed on a HPLC/MS (Agilent-1200 series) with a conventional C18 column, at room temperature and a mixed solvent of acetonitrile and water as eluent at the ratio of 20:80 (v/v) at 20 °C.

**The reduction of azo dye by DMF:** 1.3 mg  $\text{dodV}^{2+}$  was dissolved in 10 ml DMF- $\text{H}_2\text{O}$  solvent with water contents of 80 % and stirred. Then, 0.5 ml prepared aqueous SNAZOXS $^{2-}$  solution (2 mM) was added dropwise at room temperature and heated at 104 °C for 15 min. The color of solution altered from red to colorless, indicating SNAZOXS have been reduced by using dioctadecylviologen as an electron transfer catalyst in the mixed solvent composed of N,N-dimethylformamide (DMF) and  $\text{H}_2\text{O}$ .

Anaerobic conditions were achieved by bubbling dry nitrogen through the solutions for 30 min before irradiation, and during each experiment a blanket of argon was maintained over the solution.

**The reduction of azo dye by  $\text{Na}_2\text{S}_2\text{O}_4$ :** 0.5 ml prepared aqueous SNAZOXS $^{2-}$  solution (2 mM) was added dropwise to the 5 ml aqueous solution containing  $\text{Na}_2\text{S}_2\text{O}_4$  (0.2 mM or 2 mM) at room temperature, then the reaction mixture stirred for several minutes for further measurements. Upon reduction, the solution changed from red to yellow.

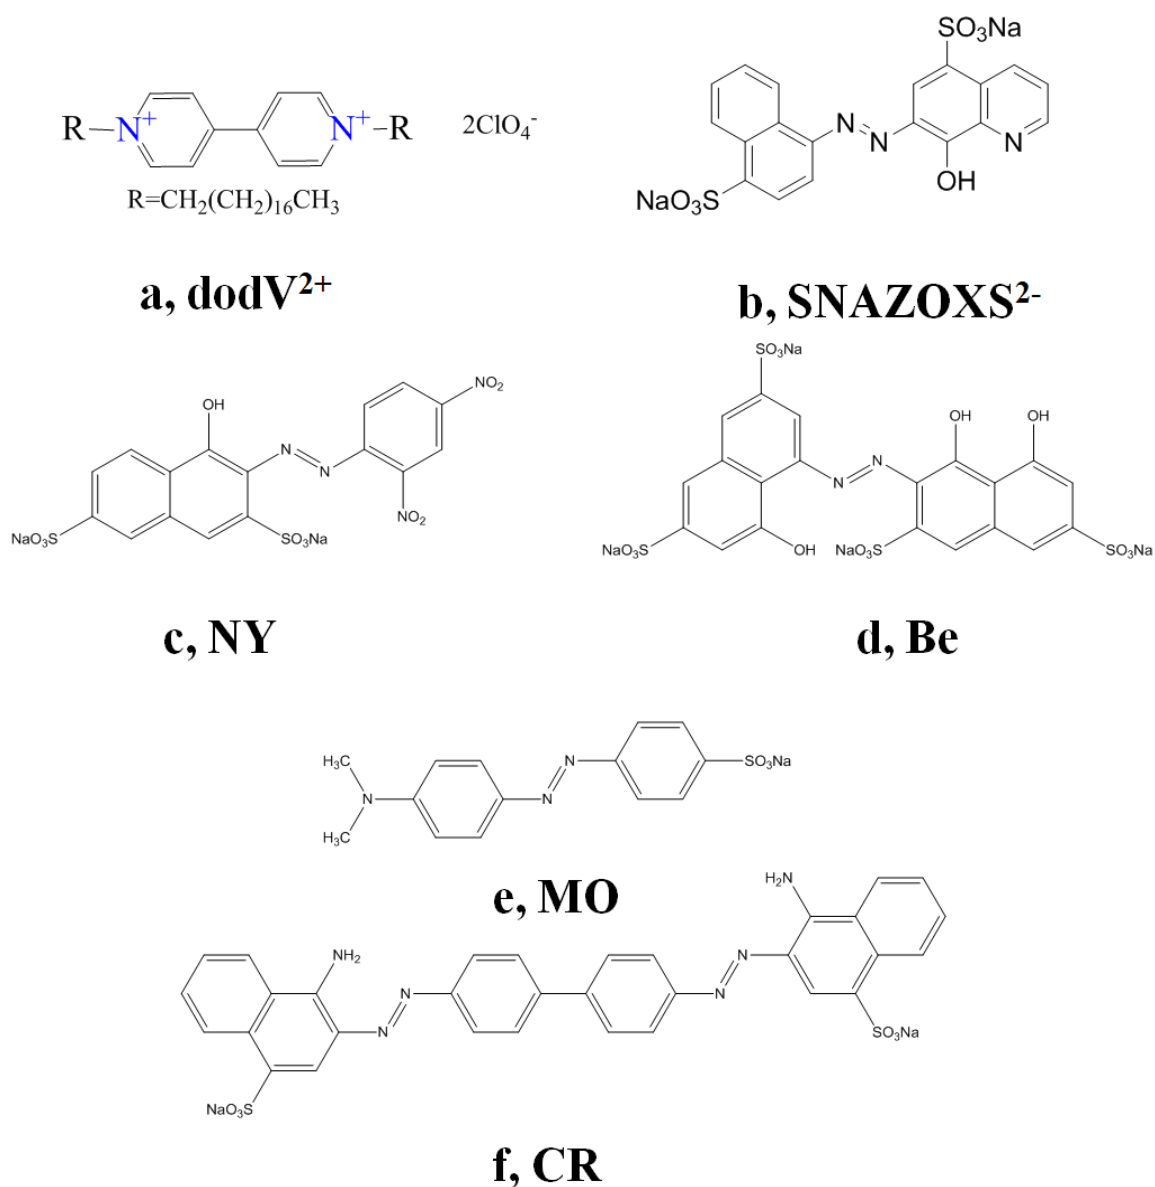

**Figure S1.** Structures of the catalyst and azo dyes used in this study: 1,1'-dioctadecyl-4,4'-bipyridinium diperchlorate(a, dodV<sup>2+</sup>); 8-hydroxy-7-(4-sulfo-1-naphthylazo)-5-quinolinesulfonic acid disodium salt (b, SNAZOXS<sup>2-</sup>); nitrazin yellow (c, NY); beryllon II (d, Be); methyl orange (e, MO); congo red (f, CR).

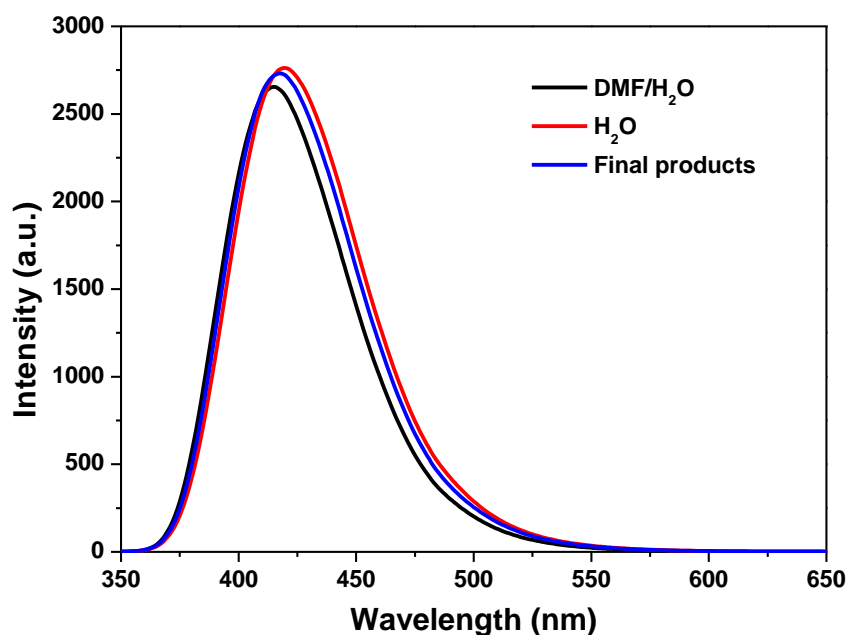

**Figure S2.** Fluorescence emission spectra of ANS in various solvents and final products of SNAZOXS<sup>2-</sup> after refluxed with dodV<sup>2+</sup> in DMF/H<sub>2</sub>O.

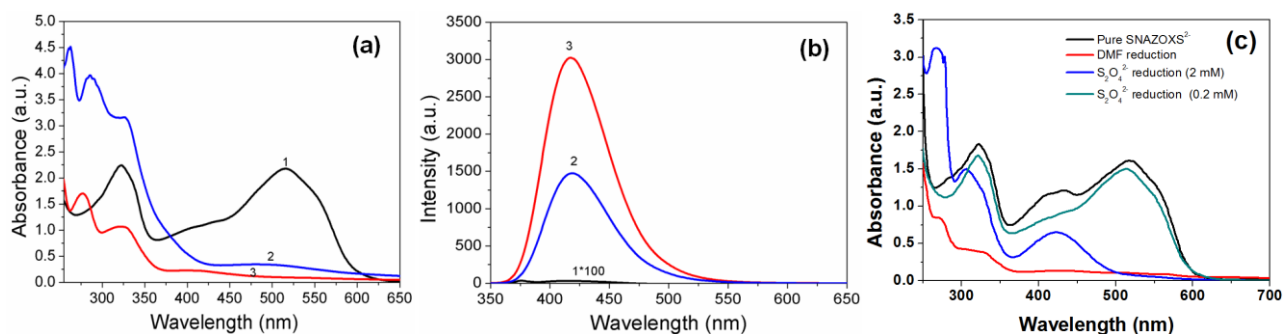

**Figure S3.** (a) UV-Vis absorbance spectra and (b) fluorescence emission spectra of 1. SNAZOXS<sup>2-</sup>; 2. SNAZOXS<sup>2-</sup> after stirred at room temperature with Na<sub>2</sub>S<sub>2</sub>O<sub>4</sub> in DMF/H<sub>2</sub>O mixtures; 3. SNAZOXS<sup>2-</sup> after heated at 104 °C for 15 min with dodV<sup>2+</sup> in DMF/H<sub>2</sub>O mixtures. (c) UV-Vis absorbance spectra of SNAZOXS<sup>2-</sup> before and after reduced by DMF or Na<sub>2</sub>S<sub>2</sub>O<sub>4</sub>.

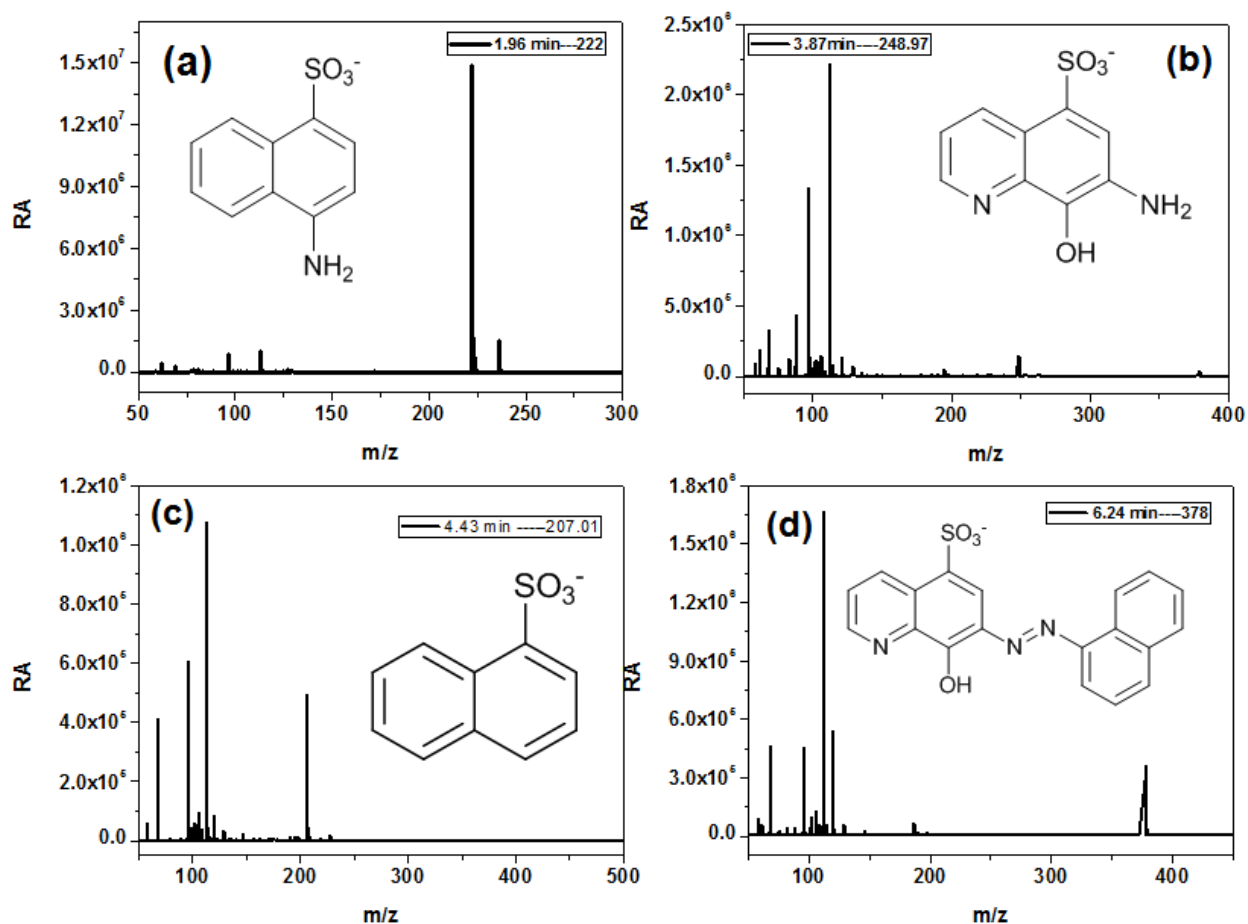

**Figure S4.** Mass spectra of the SNAZOXS<sup>2-</sup> after heated at 104 °C for 15 min with dodV<sup>2+</sup> eluting at different time (c-f): 1.95, 3.87, 4.43 and 6.24 min. ([SNAZOXS<sup>2-</sup>] = 0.2 mM).

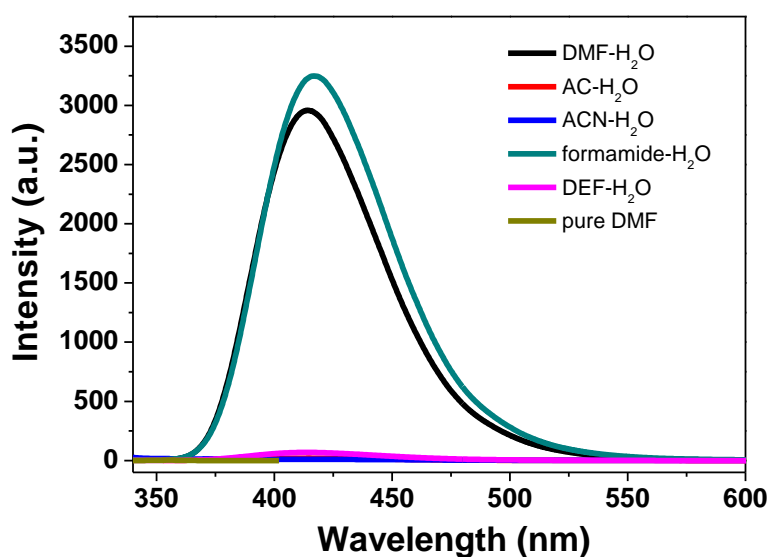

**Figure S5.** Fluorescence emission spectra of SNAZOXS<sup>2-</sup> after heated at 104 °C for 15 min with dodV<sup>2+</sup> in different solvent systems.

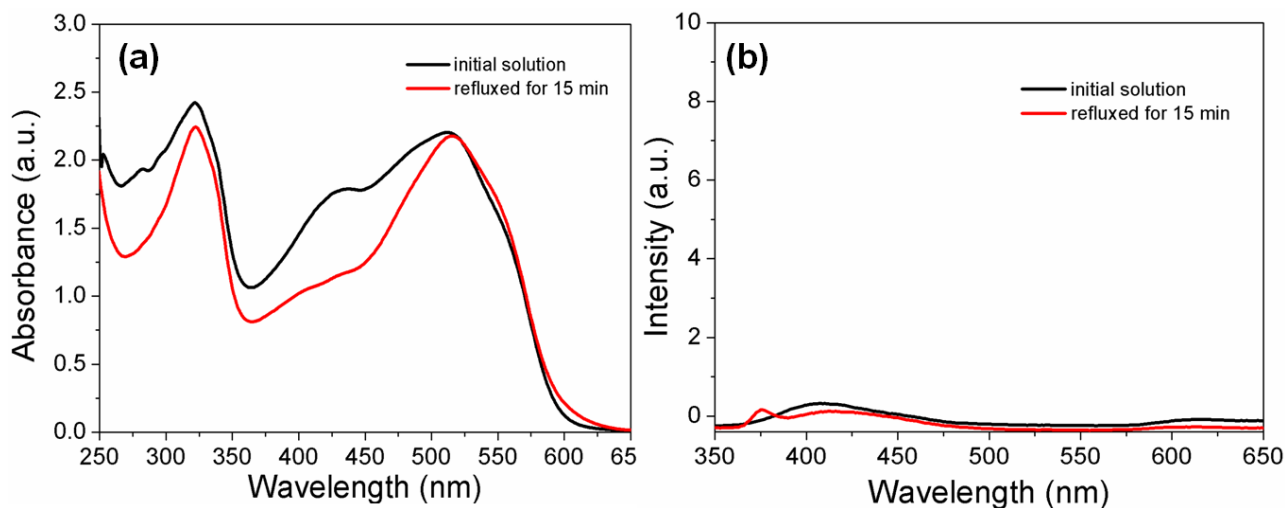

**Figure S6.** (a) UV-Vis absorbance spectra and (b) fluorescence emission spectra of SNAZOXS<sup>2-</sup> before and after heated at 104 °C for 15 min without dodV<sup>2+</sup>.

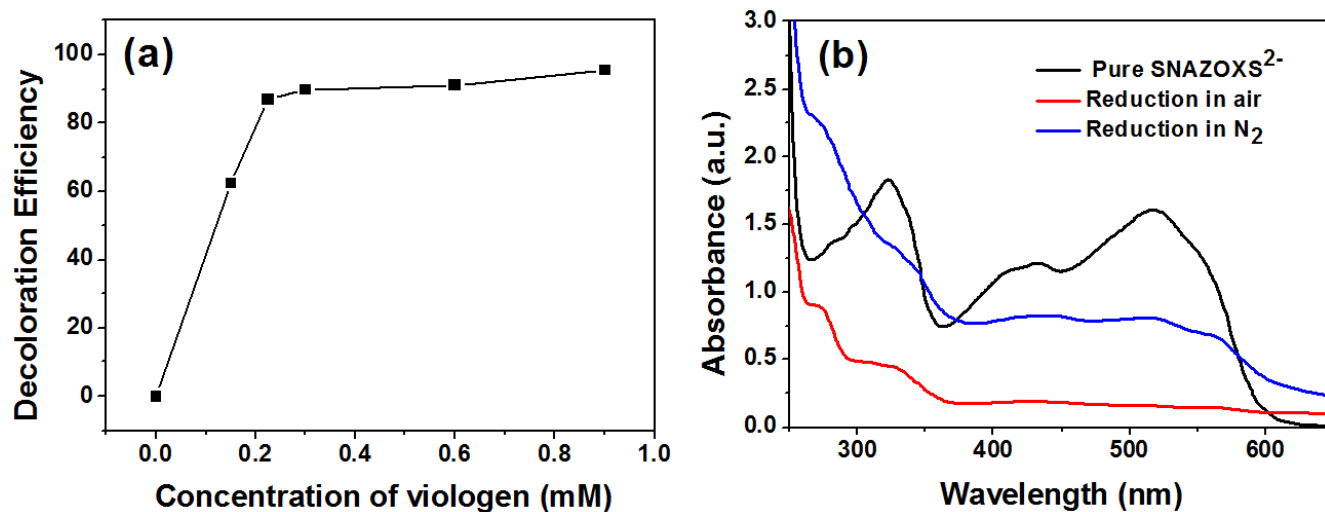

**Figure S7.** (a) The effect of viologen concentration on the decoloration efficiency of SNAZOXS<sup>2-</sup>. ( $C_{\text{SNAZOXS}2^-} = 2 \text{ mM}$ ). (b) UV-Vis absorbance spectra of SNAZOXS<sup>2-</sup> before and after heated at 104 °C for 15 min with dodV<sup>2+</sup> in DMF/H<sub>2</sub>O mixtures with or without O<sub>2</sub>.

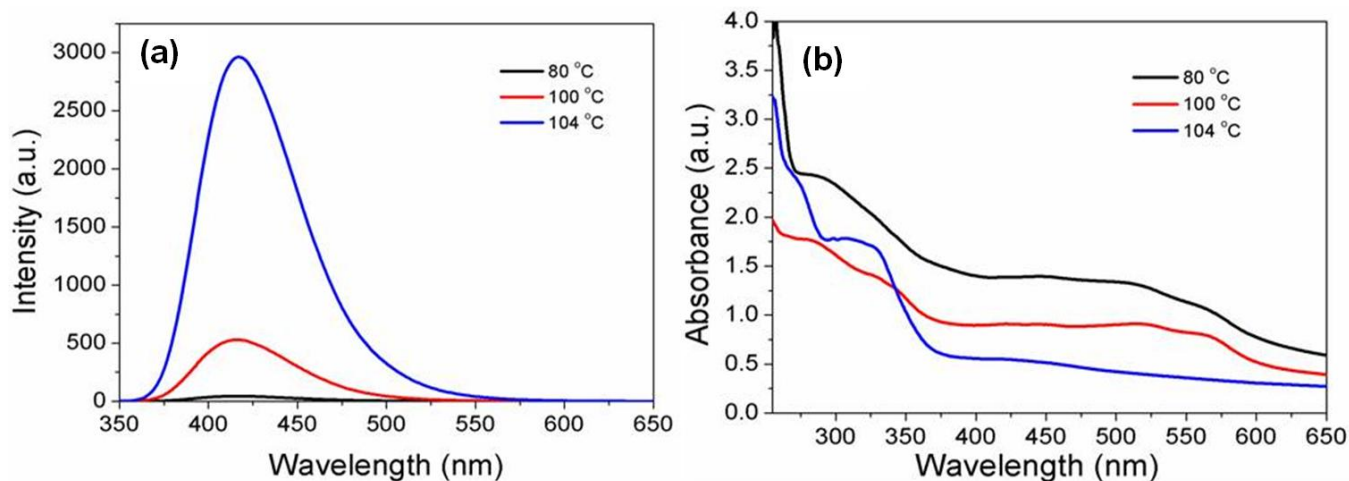

**Figure S8.** (a) Fluorescence emission spectra and (b) UV-Vis absorbance spectra of SNAZOXS<sup>2-</sup> after heated at 104 °C for 15 min with dodV<sup>2+</sup> at different temperature.

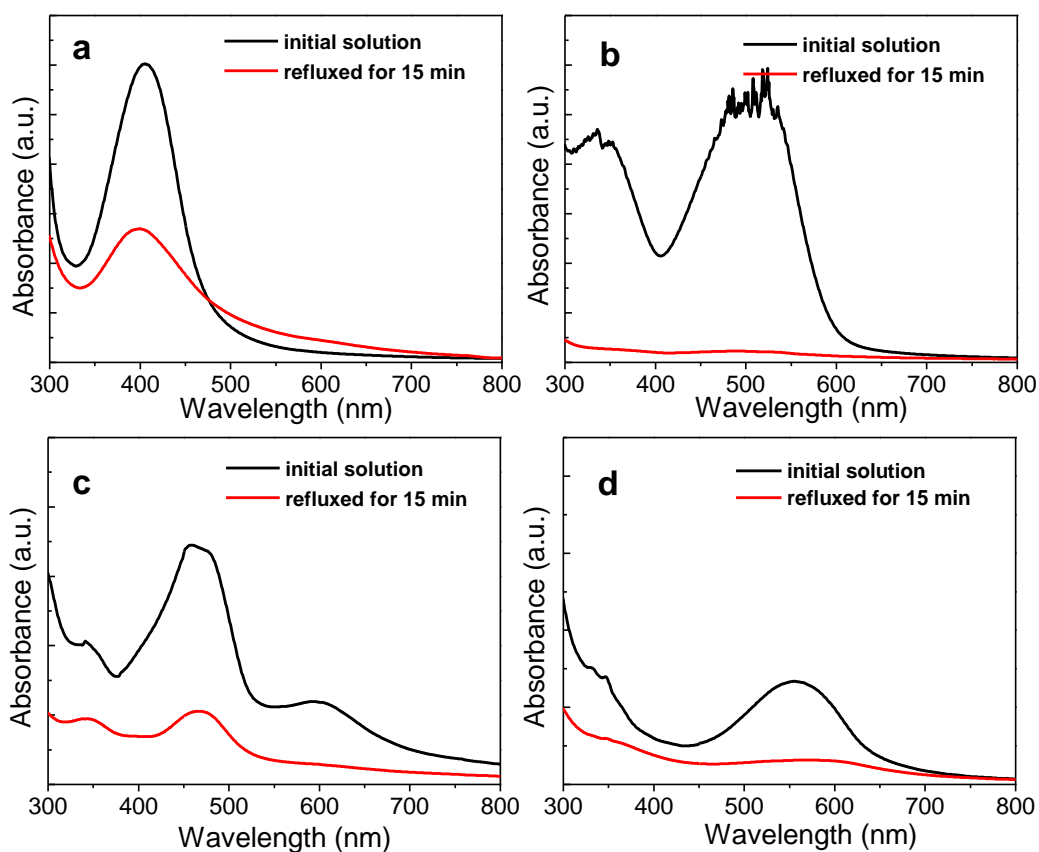

**Figure S9.** UV-Vis absorbance spectra of MO (a), CR (b), NY (c) and Be (d) before and after heated at 104 °C for 15 min with dodV<sup>2+</sup> in DMF/H<sub>2</sub>O mixture.
